# Supplementary material
Source: PubMed Central journal article supplement (PMC3399991)
Supplement: NIHMS372172-supplement-Supp_Fig_S1-S2.pdf [file NIHMS372172-supplement-Supp_Fig_S1-S2.pdf]

**Supp. Figure S1 (next page).** SLC26A9 aligned to BicA, SHST1 and SLC26A2. Predicted transmembrane helices of SLC26A9 were shaded in grey based on the membrane topology analysis of BicA (Shelden, et al., 2010). The locations of eight cSNPs of SLC26A9 were highlighted in blue. The STAS domain was indicated in green. The NCBI / GenBank accession numbers for these sequences are BicA (*Synechococcus* sp.PCC7002; ABG46427), SHST1 (*Stylosanthes hamata* high-affinity sulfate transporter; P53391), human SLC26A2 (*Homo sapiens* solute carrier family 26 member 9 isoform a; AAH59390), human SLC26A9 (*Homo sapiens* solute carrier family 26 member 9 isoform a; NP\_443166).

|                |                                                                                     |                                                                        |                                                  |             |
|----------------|-------------------------------------------------------------------------------------|------------------------------------------------------------------------|--------------------------------------------------|-------------|
| BicA           | -----                                                                               |                                                                        |                                                  | -           |
| SHST1          | MSQRVSDQVMADVIAETRNSSSSHRHGGGGGGD---DTTSLPYMHKVGTPPKQTLFQEIKHSFN-----ET             |                                                                        |                                                  | 63          |
| SLC26A2        | -----MSSESKEQHNVSPRDSAEGNDSYPSGIHLELQRESSTDFKQFETNDQCRPYHRILIERQEKSDTNFKE           |                                                                        |                                                  | 68          |
| <b>SLC26A9</b> | -----MSQPRPRYVVDVDR-----AAYSLTLFDD-----EFEKKDRTPYVG-----                            |                                                                        |                                                  | 34          |
|                |                                                                                     | <b>TM1</b>                                                             | <b>TM2</b>                                       |             |
| BicA           | -----MQITNKIHFNRN-IRGDI                                                             | IFGGLTAAVIALPMALAFGVASGAGAEAGLWGAVL                                    |                                                  | 50          |
| SHST1          | FFPDKPFGKFKDQSGFRKLELGLQYIFPILEWGRHYDLKK-FRGDF                                      | FIAGLTIASLCIPQDLAYAKLANLDPWYGLYSSFV                                    |                                                  | 142         |
| SLC26A2        | FVIKKLQKNCQCSP--AKAKNMILGFLPVLQWLPKYDLKKNILGDVMSGLIVGILLVPQSIAYSLLAGQEPVYGLYTSFF    |                                                                        |                                                  | 146         |
| <b>SLC26A9</b> | ---EKLRNAFRCSS--AKIKAVVFGLLPVLSWLPNYKIKD                                            | YIIPDLLGGLSGGSIQVPQGMFAFALLANLPAVNGLYSSFF                              |                                                  | 109         |
|                | <b>TM2</b>                                                                          | <b>TM3</b>                                                             | <b>TM4</b>                                       |             |
| BicA           | VGFFAALFGGTPTLISEPTGPMTVVMTAVIAHFTASAATPEE--G-----                                  |                                                                        | LAI AFTVV                                        | 101         |
| SHST1          | APLVYAFMGTSRDIAIGPVAVVSLLLGTLLSNEISNTKSHDY-----                                     |                                                                        | LRLAFTAT                                         | 192         |
| SLC26A2        | ASIIYFLLGTSRHSISVGI FGVLC LMIGETVDRELQKAGYDNAHSAPSLGMVSNGSTLLNHTSDRICDKSCYA         |                                                                        | IMVGSTVT                                         | 226         |
| <b>SLC26A9</b> | PLLTYYFLLGGVHQMPVG                                                                  | IFAVISILVGNICLQLAPESKFQVFNNATNESYVDTAAMEAER-----                       | LHVSATLA                                         | 177         |
|                | <b>TM4</b>                                                                          | <b>TM5</b>                                                             | <b>TM6</b>                                       |             |
| BicA           | MMAGVFQII FGS LKLGKYVTMMPYTVISGFM                                                   | SGIGIILVILQLAPFLGQASPG-GGVIGTLQNLPTLLSNIQP--                           | GETAL                                            | 178         |
| SHST1          | FFAGVTQMLLGVCR LGFLIDFLSHAAIVGFMAGAAITIGLQQLKGLLGISNNTFTKKTDIISVMRSVWTHVHHGWNWETI   |                                                                        |                                                  | 272         |
| SLC26A2        | FIAGVYQVAMGFFQVGFVSVYLS DALLSGFVTGASFTILTSQAKYLLGLNLPRTNGVGLITTWIHFVFRNIHK-TNLCDL   |                                                                        |                                                  | 305         |
| <b>SLC26A9</b> | CLTAIIQMG LGFMQFGFVAIYLSSEFIRGFMTAAGLQILISVLKYIFGLTIPSYTGPGSIVFTFIDICKNLPH-TNIASL   |                                                                        |                                                  | 256         |
|                | <b>TM6</b>                                                                          | <b>TM7</b>                                                             | <b>TM8</b>                                       |             |
| BicA           | ALGTVAIIWFMP-----EKFKKVI                                                            | PPQLVALVLTGTVIAFFVFPPEVSDLRRIGEIRAGFPELVRPSFSPVEFQRM                   |                                                  | 249         |
| SHST1          | LIGLSFLIFLLITKYIAKKNKFLVWSAISPMISVIVSTFFVYITRADKR-GVSIVKHIKSGVNPSSANEIF--FHGKYL     |                                                                        |                                                  | 349         |
| SLC26A2        | ITSLCLLVLLPTKELNEHFKSKLKAPIPIELVVVAATLASHFGKLNHENYNSSIAGHIPTGFMPPKVPENW--LIPSPA     |                                                                        |                                                  | 383         |
| <b>SLC26A9</b> | IFALISGAFVLVVKELNARYMHKIRFPIPTEMIVVVVATAISGGCKMPKHYHMQIVGEIQRGFPTVSPVVS--QWKDMI     |                                                                        |                                                  | 334         |
|                | <b>TM8</b>                                                                          | <b>TM9</b>                                                             |                                                  |             |
| BicA           | LDAAVLGM LG----CIDALLTSVADSLTRTEHNSKELIGQGLGNLFSGLFGGIAGAGATMGTVVNIQSGGRTALSGLV     |                                                                        |                                                  | 325         |
| SHST1          | GAGVRVGVVAGLVALTEAIAIGRTFAAMKDYALDGNKEMVAMGTMNIVGSLSSCYVTTGFSRSRAVNYMAGCKTAVSNIV    |                                                                        |                                                  | 429         |
| SLC26A2        | VDAIAISIIIG----FAITVSLSEMF AKKHGYTVKANQEMYAIGFCNII PSFFHCFTTSAALAKTLVKESTGCHTQLSGVV |                                                                        |                                                  | 459         |
| <b>SLC26A9</b> | GTAFSLAIVS----YVINLAMGRTLANKHGYDVDSNQEMIALGCSNFFGSGFFK                              | IHVICCALSVTLAVDGGGKSQVASLC                                             |                                                  | 410         |
|                | <b>TM9</b>                                                                          | <b>TM10</b>                                                            | <b>TM11</b>                                      | <b>TM12</b> |
| BicA           | RAFVLLVVILGAASLTATIPLAVLAGIAFKVGVD-IIDWSFLKRAHEISPKGALIMYGVILLTVLVDLIVAVGVGVFVAN    |                                                                        |                                                  |             |
| SHST1          | MSIVVLLTLLVITPLFKYTPNAVLASIIIAAVVN-LVNIEMVLLWKIDKDFVACMGAFFGVIFKSVEIGLLIAVAISF      |                                                                        |                                                  | 508         |
| SLC26A2        | TALVLLVLLVIAPLFYSLQKSVLGVITIVNLRGALRKFRDLPKMWSISRMDTVIWFVMTLSSALLSTEIGLLVGVCFSI     |                                                                        |                                                  | 539         |
| <b>SLC26A9</b> | VSLVVMITMLVLGIYLYPLPKSVL GALIAVNLKNSLKQLTDPYYLWRKSKLDCCIWVVSFLSSFFLSLPLPYGVAVGVAFSV |                                                                        |                                                  | 490         |
|                | <b>TM12</b>                                                                         |                                                                        |                                                  |             |
| BicA           | VLTIERMSNLQSEKVQTVSDADDNIRLTTTEKRWLDEGQGRVLLFQLSGPMIFGVAKAIAREHNAMG-----            |                                                                        |                                                  | 471         |
| SHST1          | AKILLQVT                                                                            | RPRTAVLGKLPGTSVYRNIQYYPK--AAQIPG-MLIIRVDSAIYFSNSNYIKERILRWL-----       | IDE                                              | 575         |
| SLC26A2        | FCVILRTQKP                                                                          | KSSLLGLVEESEVFESVSAYKN--LQTKPG-IKIFRFVAPLYYINKECFKSALYKQT-VNPILIKVAWKK |                                                  | 615         |
| <b>SLC26A9</b> | LVVVFQTTQFR                                                                         | NGYALAQVMDTDIYVNPKTYNR--AQDIQG-IKIITYCSPLYFANSEIFRQKVIAKTGMDPQKVLAKQK  |                                                  | 567         |
|                | -----                                                                               |                                                                        |                                                  | -           |
| BicA           | -----                                                                               |                                                                        |                                                  | -           |
| SHST1          | GAQR-----                                                                           |                                                                        | TESELP-----                                      | 585         |
| SLC26A2        | AAKR--K-----                                                                        | IKEKVVTLGGIQDEMS-----                                                  | VQLSHDP-----                                     | 643         |
| <b>SLC26A9</b> | YLKKQEK                                                                             | RRMRPTQQRSLFMKTKTVSLQELQDFENA                                          | PPTDPNNTQTPANGTSVSYITFSPDSSSPAQSEPPASAEAPG       | 647         |
|                | -----                                                                               |                                                                        |                                                  | -           |
| BicA           | -----DCDALVFDIGEVPHMGV TASLALENAIEEALDKERQVYIVGAAGQTRRRLEKLFKRVV--PDKCL             |                                                                        |                                                  | 536         |
| SHST1          | -----EIQHLITEMSPVPDIDTSGIHAFEELYKTLQKREVQLILANPGPVVIEKLGASKLTELIG--EDKIF            |                                                                        |                                                  | 650         |
| SLC26A2        | -----LELHTIVIDCSAIQFLDTAGIHTLKEVRRDYEAIGIQVLLAQCNPTVRDSL TNGEYCKKE--EENLLF          |                                                                        |                                                  | 709         |
| <b>SLC26A9</b> | EPDMLASVPPFVTFHTLILDMSGVSFV DLMGICALAKLSSTYGKIGVKVFLVNIHAQVYNDISHGGVFEDGSLECKHVF    |                                                                        |                                                  | 727         |
|                | -----                                                                               |                                                                        |                                                  | -           |
| BicA           | MSREEAL                                                                             | KNAVLGIY-----                                                          | PHLADGV TAP SSEMG-----                           | 566         |
| SHST1          | LTVADAV                                                                             | ATYGPKT-----                                                           | AA----F-----                                     | 667         |
| SLC26A2        | YSVYEAM                                                                             | AFAEVSK-----                                                           | NQKGVCVPNGLSLSSD-----                            | 739         |
| <b>SLC26A9</b> | PSIHDAV                                                                             | LFAQANARD                                                              | VTPGHNFGQAPGDAELSLYDSEEDIRSYWDLEQEMFGSMFHAETLTAL | 791         |

- SLC26A9 cSNPs -

- TM# -

- STAS domain -

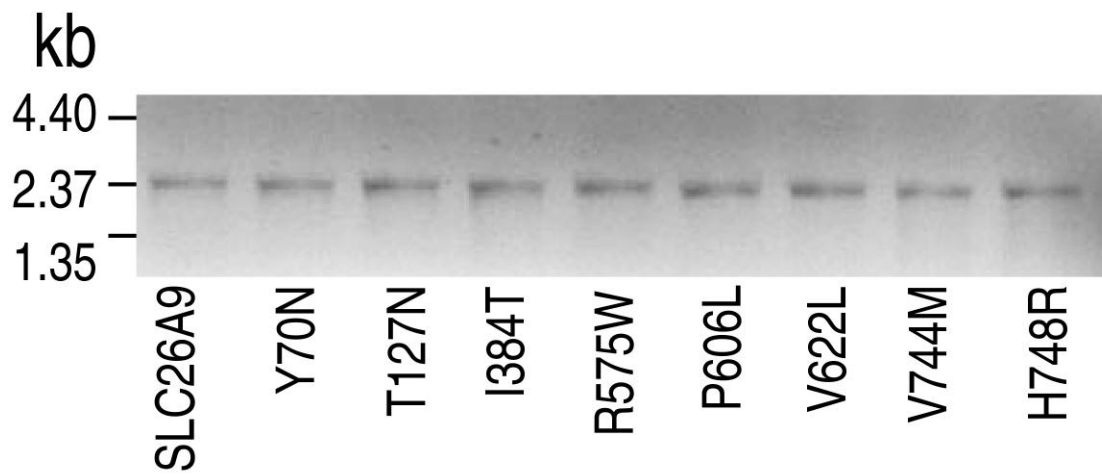

**Supp. Figure S2.** RNA quality for oocyte injections. RNA gel-electrophoresis of capped cRNA used for *Xenopus* oocytes injections. Approximately 100ng cRNA of SLC26A9 and eight cSNPs were loaded on 0.8% formaldehyde agarose gel. The cRNAs were then diluted 20 fold for injection (5ng). The 0.24 to 9.5kb RNA ladder is indicated on the left. The predicted cRNA sizes are 2.3kb.
